# Supplementary material for: A high energy density Li2S@C nanocomposite cathode with a nitrogen-doped carbon nanotube top current collector
Source: Royal Society of Chemistry journal article supplement (doi:10.1039/c5ta05819h), 2015-01-01
Supplement: c5ta05819h1.pdf [file c5ta05819h1.pdf]

## Supporting Information

# High Energy Density $\text{Li}_2\text{S}@\text{C}$ Nanocomposite Cathode with a Nitrogen-doped Carbon Nanotube Top Current Collector

Su Zhang,<sup>a,b</sup> Meinan Liu,<sup>\*a</sup> Fei Ma,<sup>b</sup> Fangmin Ye,<sup>a</sup> Hongfei Li,<sup>a,c</sup> Xinyi Zhang,<sup>a</sup> Yuan Hou,<sup>a</sup> Yongcai Qiu,<sup>a</sup> Wanfei Li,<sup>a</sup> Jian Wang,<sup>a</sup> Jin Wang,<sup>a</sup> Yuegang Zhang<sup>\*a,c</sup>

<sup>a</sup>*Lab, Suzhou Institute of Nano-Tech and Nano-Bionics, Chinese Academy of Sciences, Suzhou, Jiangsu 215123, China*

<sup>b</sup>*School of Materials Science and Engineering, Xi'an Jiaotong University, Xi'an 710049, China*

<sup>c</sup>*Department of Physics, Tsinghua University, Beijing 100084, China*

*\*E-mail: ygzhang2012@sinano.ac.cn; mnliu2013@sinano.ac.cn*

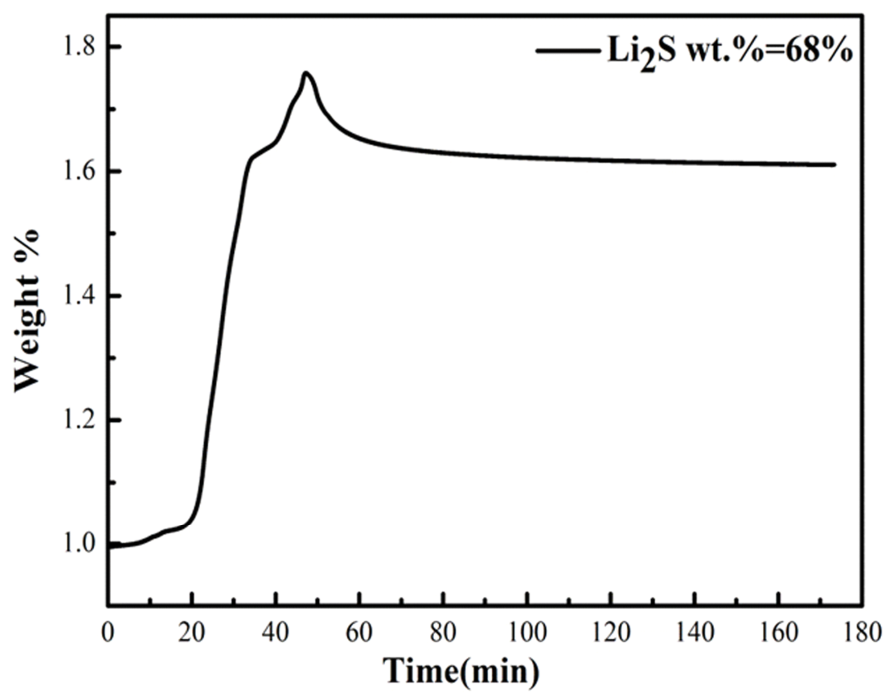

**Figure S1.** TGA curve of Li<sub>2</sub>S@C composites heating in air.

$$\text{wt \% (Li}_2\text{S)} = \text{wt \% (Li}_2\text{SO}_4) \times M(\text{Li}_2\text{S}) / M(\text{Li}_2\text{SO}_4)$$

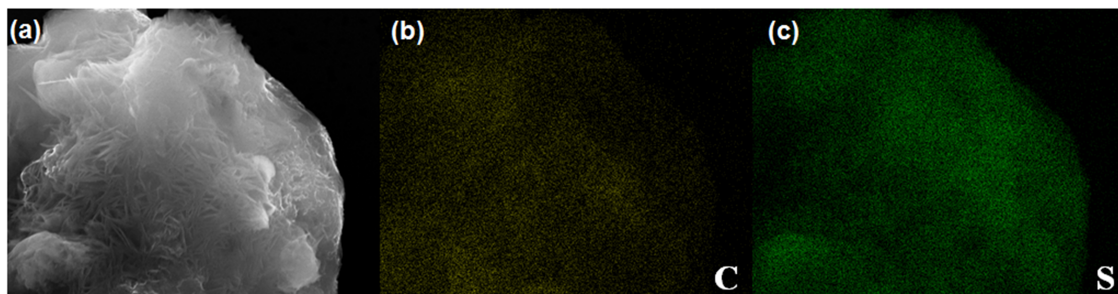

**Figure S2.** (a) SEM image of  $\text{Li}_2\text{S}@\text{C}$  composites; (b) elemental mapping results of C; (c) elemental mapping results of S.

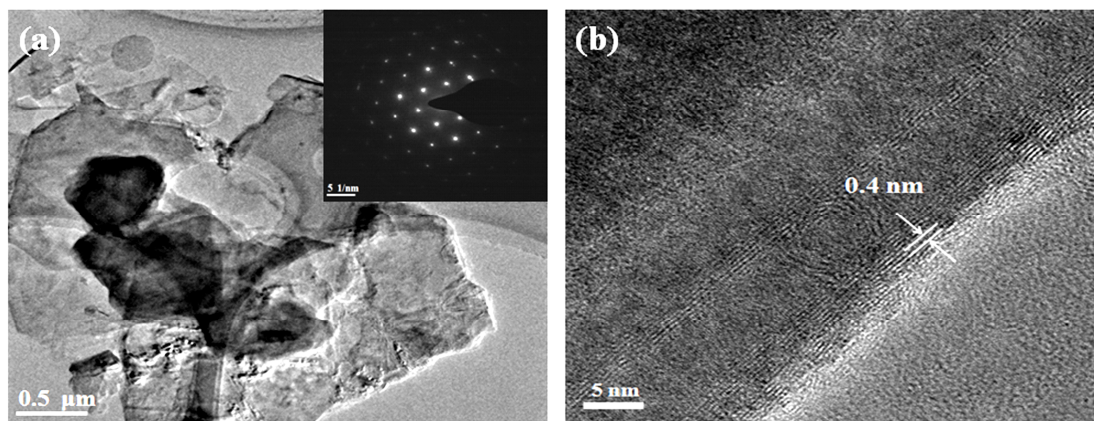

**Figure S3.** (a) A representative FETEM image of  $C_{AG}$  and SAED pattern of  $C_{AG}$ ; (b) HRTEM image of  $C_{AG}$ .

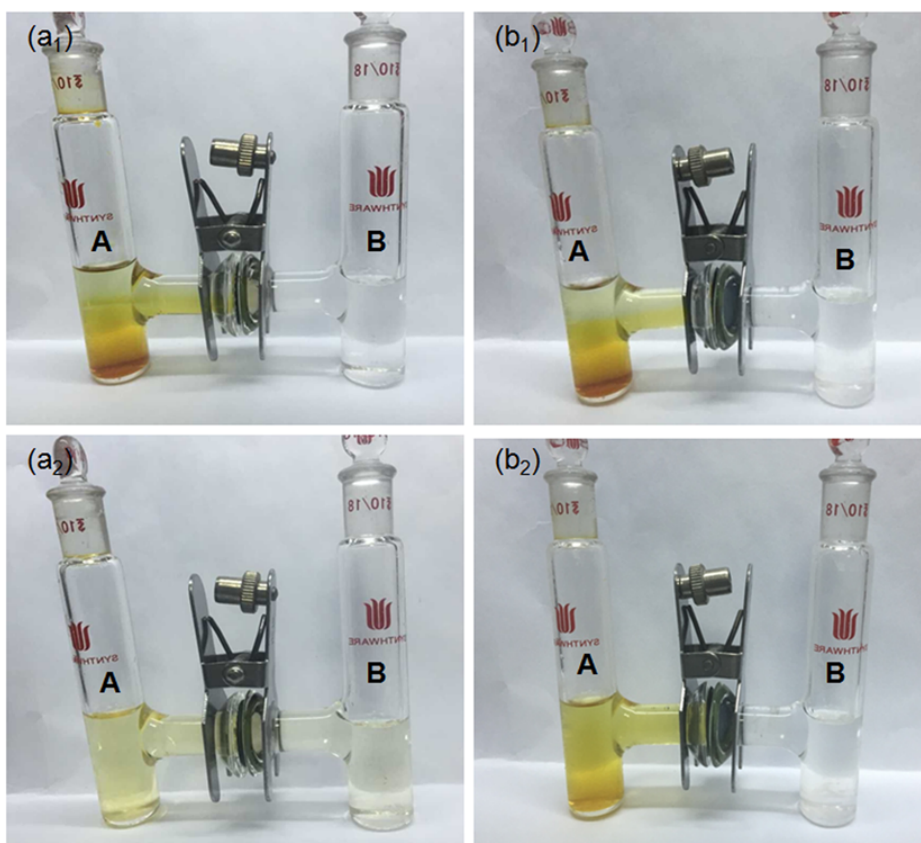

**Figure S4.** Photos of the H-type glass containers with “side A” containing electrolyte with  $\text{Li}_2\text{S}_8$  and “side B” containing pure electrolyte: (a<sub>1</sub>) pure separator at 0 min; (a<sub>2</sub>) pure separator after 20h; (b<sub>1</sub>) pure separator with N-CNT film at 0 min; (b<sub>2</sub>) pure separator with N-CNT film after 20 h.

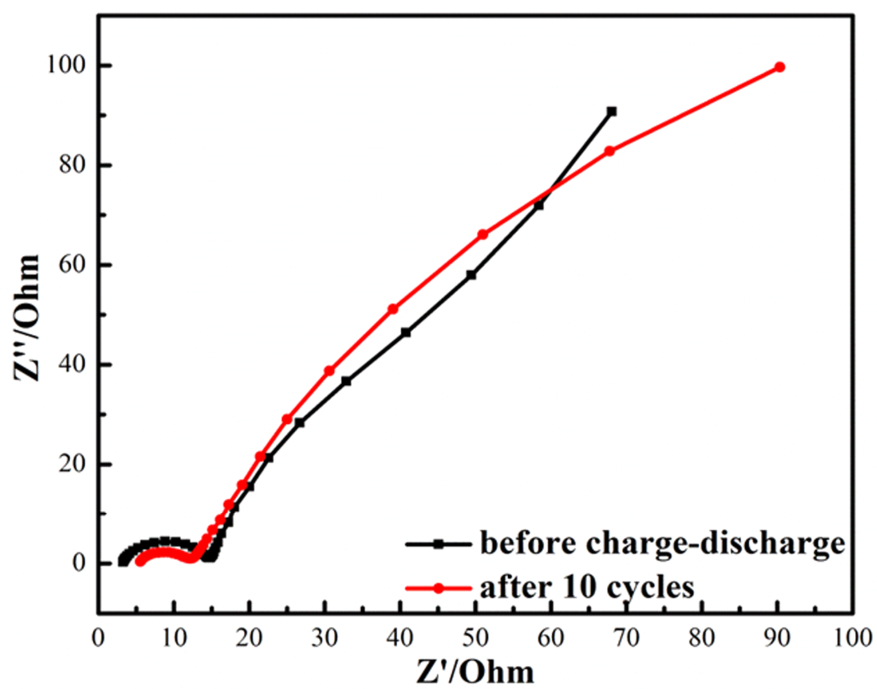

**Figure S5.** Electrochemical impedance spectra of  $\text{Li}_2\text{S}@C$  composites with N-CNT top current collector.

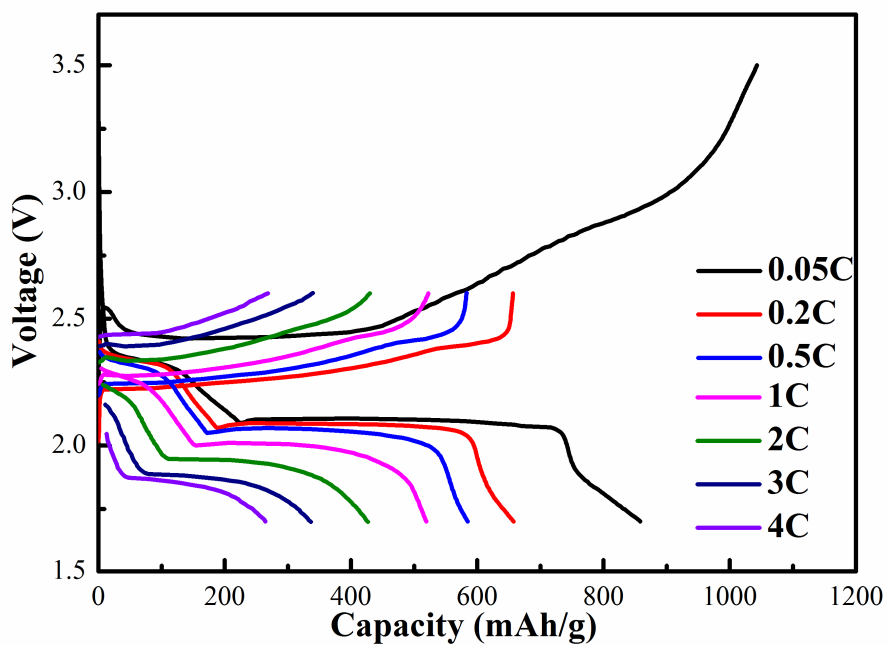

**Figure S6.** Voltage-capacity profiles of the top current collector cell with  $\text{Li}_2\text{S}@C$  cathode at various discharge/charge current rates.

The calculation method of Li<sub>2</sub>S wt % and S wt % in electrode:

$$\text{Li}_2\text{S wt\% in electrode} = \frac{\text{areal weight of Li}_2\text{S}}{\frac{\text{areal weight of Li}_2\text{S}}{\text{Li}_2\text{S wt\% in electrode materials}} + \text{areal weight of Al}}$$

$$\text{areal weight of S} = \text{areal weight of Li}_2\text{S} \times 32 / 46$$

$$\text{areal weight of (C+B)} = \frac{\text{areal weight of Li}_2\text{S}}{\text{Li}_2\text{S wt\% in electrode materials}} - \text{areal weight of Li}_2\text{S}$$

$$\text{S wt\% in electrode} = \frac{\text{areal weight of S}}{\text{areal weight of (C+B)} + \text{areal weight of S} + \text{areal weight of Al}}$$

In equations, C means conductive carbon and B means binders.

The specific energy of electrode was calculated by:

$$\text{Specific energy of electrode} = \text{Specific capacity of electrode} \times 2.1$$



**Table S1** The specific capacity and energy density calculated based on the total electrode for Li/Li<sub>2</sub>S cells.

|                                                                | <i>Li<sub>2</sub>S areal</i>                    | <i>Li<sub>2</sub>S wt % in composite</i>                            | <i>Li<sub>2</sub>S wt % in cathode materials</i>            | <i>Li<sub>2</sub>S wt % in electrode<sup>b</sup> (wt %)</i>                                                 | <i>Initial specific capacity of Li<sub>2</sub>S (mAh/g Li<sub>2</sub>S) at specific current for cycling</i> | <i>Initial capacity of electrode (mAh/g electrode)</i>        | <i>specific initial energy of electrode (Wh/kg electrode)</i> | <i>specific</i> |
|----------------------------------------------------------------|-------------------------------------------------|---------------------------------------------------------------------|-------------------------------------------------------------|-------------------------------------------------------------------------------------------------------------|-------------------------------------------------------------------------------------------------------------|---------------------------------------------------------------|---------------------------------------------------------------|-----------------|
| <i>Weight (mg/cm<sup>2</sup>)</i>                              | <i>Li<sub>2</sub>S wt % in composite (wt %)</i> | <i>Li<sub>2</sub>S wt % in cathode materials<sup>a</sup> (wt %)</i> | <i>Li<sub>2</sub>S wt % in electrode<sup>b</sup> (wt %)</i> | <i>Initial specific capacity of Li<sub>2</sub>S (mAh/g Li<sub>2</sub>S) at specific current for cycling</i> | <i>Initial capacity of electrode (mAh/g electrode)</i>                                                      | <i>specific initial energy of electrode (Wh/kg electrode)</i> | <i>specific</i>                                               | <i>specific</i> |
| <b>Li<sub>2</sub>S@C<sub>(BM)</sub></b> <sup>9</sup>           | 67.5                                            | 50.6                                                                | 43.47                                                       | 342 at 0.5C                                                                                                 | 148.6                                                                                                       | 312                                                           |                                                               |                 |
| <b>Li<sub>2</sub>S@C<sub>(NF)</sub></b> <sup>37</sup>          | 72.2                                            | 60                                                                  | 20                                                          | 620 at 0.5C                                                                                                 | 124                                                                                                         | 260                                                           |                                                               |                 |
| <b>Li<sub>2</sub>S@C<sub>(polypyrrole)</sub></b> <sup>41</sup> | 86                                              | 51.6                                                                | 16.4                                                        | 670.5 at 0.5C                                                                                               | 110                                                                                                         | 230.7                                                         |                                                               |                 |
| <b>Li<sub>2</sub>S@C<sub>(RF ge)</sub></b> <sup>38</sup>       | 62                                              | 49                                                                  | 11.6                                                        | 330 at 0.5C                                                                                                 | 38.3                                                                                                        | 80.4                                                          |                                                               |                 |
| <b>In-stiu TG-Li<sub>2</sub>S</b> <sup>47</sup>                | 67                                              | 53                                                                  | 18.9                                                        | 750 at 0.5C                                                                                                 | 142                                                                                                         | 298                                                           |                                                               |                 |
| <b>Li<sub>2</sub>S@C<sub>(CB)</sub></b> <sup>48</sup>          | 81                                              | 78                                                                  | 41.7                                                        | 700 at 0.1C                                                                                                 | 292                                                                                                         | 613                                                           |                                                               |                 |
| <b>Li<sub>2</sub>S@C(our work)</b>                             | 68                                              | 68                                                                  | 49                                                          | 667 at 0.5C                                                                                                 | 327                                                                                                         | 686                                                           |                                                               |                 |

a. Cathode materials include active materials, binders and conductive additives;

b. Total electrode includes current collector and cathode materials; and the area weight with 4.2 mg/cm<sup>2</sup> of Al current collector was used here to calculate Li<sub>2</sub>S wt% in total cathode in these compared works.

**Table S2** Comparison of the sulfur weight percentage, the capacity of Li<sub>2</sub>S composite cathodes was converted to sulfur. The specific capacity and specific energy calculated based on the total electrode for our cells, several representative solid sulfur cathodes, solid Li<sub>2</sub>S cathodes and liquid polysulfide cathodes.

|                                                            | <i>S areal</i> | <i>S wt % in S composite (wt %)</i> | <i>S wt % in S cathode materials<sup>a</sup> (wt %)</i> | <i>S wt % in S electrode<sup>b</sup> (wt %)</i> | <i>Initial specific capacity of S (mAh/g S) at specific current for cycling</i> | <i>Initial specific capacity of S (mAh/g electrode) of electrode</i> | <i>initial specific energy (Wh/kg electrode)</i> |
|------------------------------------------------------------|----------------|-------------------------------------|---------------------------------------------------------|-------------------------------------------------|---------------------------------------------------------------------------------|----------------------------------------------------------------------|--------------------------------------------------|
| S/CMK3 <sup>42</sup>                                       | 1.13           | 70                                  | 58.8                                                    | 19.1                                            | 1005 at 0.1C                                                                    | 191.9                                                                | 403.1                                            |
| S/CNT@MPC <sup>43</sup>                                    | 1              | 40                                  | 32                                                      | 14.0                                            | 1120 at 0.5C                                                                    | 156.8                                                                | 329.3                                            |
| GO/S/CTAB <sup>7</sup>                                     | 0.8            | 80                                  | 56                                                      | 14.7                                            | 860 at 1C                                                                       | 126.4                                                                | 265.5                                            |
| S@PVP <sup>44</sup>                                        | 1              | 70                                  | 49                                                      | 16.5                                            | 990 at 0.5C                                                                     | 163.4                                                                | 343.0                                            |
| Liquid Li <sub>2</sub> S <sub>6</sub> <sup>45</sup>        | ~1.5           | 40.6 <sup>c</sup>                   | 40.6 <sup>c</sup>                                       | 30.8                                            | 1224 at 0.5C                                                                    | 377.4                                                                | 793                                              |
| Li <sub>2</sub> S@C <sub>(BM)</sub> <sup>9</sup>           | 4.05           | 47                                  | 35.2                                                    | 36.9                                            | 488.6 at 0.5C                                                                   | 180.2                                                                | 378.6                                            |
| Li <sub>2</sub> S@C <sub>(NF)</sub> <sup>37</sup>          | 1.04           | 50                                  | 41.7                                                    | 18                                              | 886 at 0.5C                                                                     | 159.5                                                                | 335                                              |
| Li <sub>2</sub> S@C <sub>(polypyrrole)</sub> <sup>41</sup> | 0.7            | 60                                  | 36                                                      | 12                                              | 957.9 at 0.5C                                                                   | 115                                                                  | 241                                              |

|                                                        |         |      |      |      |              |       |     |
|--------------------------------------------------------|---------|------|------|------|--------------|-------|-----|
| $\text{Li}_2\text{S}@C_{(\text{RF ge})}$ <sup>38</sup> | 0.38    | 43   | 34   | 9    | 471 at 0.5C  | 42.4  | 89  |
| S/PNCF <sup>46</sup>                                   | 1.9     | 42.8 | 42.8 | 42.8 | 988 at 0.5C  | 422.8 | 888 |
| In-situ TG- $\text{Li}_2\text{S}$ <sup>47</sup>        | 0.91    | 47   | 37   | 14   | 1071 at 0.5C | 150   | 315 |
| $\text{Li}_2\text{S}@C_{(\text{CB})}$ <sup>48</sup>    | 2.8     | 56.7 | 54.6 | 31.7 | 1000 at 0.1C | 317   | 666 |
| $\text{Li}_2\text{S}@C_{(\text{our work})}$            | 2.1~2.8 | 47   | 47   | 40.2 | 953 at 0.5C  | 383   | 804 |

a. Cathode materials include active materials, binders and conductive additives;

b. Total electrode includes current collector and cathode materials; and the area weight with  $4.2 \text{ mg/cm}^2$  of Al current collector was used here to calculate S wt% in total electrode in these compared works.

$$\text{c. S wt\% in liquide electrode} = \frac{\text{areal weight of } \text{Li}_2\text{S}_6}{\text{areal weight of } \text{Li}_2\text{S}_6 + \text{areal weight of electrolyte (in liquide } \text{Li}_2\text{S}_6)} \times \frac{6M_s}{M_{\text{Li}_2\text{S}_6}}$$

The electrolyte density of 1.805 g/mL was used here to calculate the weight of electrolyte in liquid cathode and the “real” electrolyte part in cells was not counted.
